# Supplementary material for: Identification of GROWTH-REGULATING FACTOR Transcription Factor Family Involved in Leaf Growth Regulation in Lettuce (Lactuca sativa L.)
Source: Research Square preprint supplement (doi:10.21203/rs.3.rs-289872/v1), 2021-03-15
Supplement: Supplementary file 1 [file afbc397ffe21f27b8e0d3733.xlsx]

## Sheet: Primer
Table S2. The sequences of Primers used in this study
Primers	Sequence
BD-GRF5-full length-F	ATGATGAGTAGTGGTAGTAA
BD-GRF5-full length-R	CTACCAGTAGGATCTGGGTT
BD-GRF51-155-F	ATGATGAGTAGTGGTAGTAA
BD-GRF51-155-R	CGAGATATTTGTGGTTGTCG
BD-GRF5156-317-F	AAATCGATCTCGCCTTCTGA
BD-GRF5156-317-R	CTACCAGTAGGATCTGGGTT
pSAT6-EGFP-GRF5-F	ATGATGAGTAGTGGTAGTAA
pSAT6-EGFP-GRF5-R	CCAGT AGGAT CTGGG TTTGG
pEZR(K)-LC-miR396a-F	ATTCTCCTATAAATACGCCT
pEZR(K)-LC-miR396a-R	ATACAGCGAAACAACATTGA
pEZR(K)-LC-GRF5-F	ATGATGAGTAGTGGTAGTAA
pEZR(K)-LC-GRF5-R	CTACCAGTAGGATCTGGGTT
qRT-PCR-actin F	AGGCTGTGCTTTCTTTGT
qRT-PCR-actin R	TCTTCATTAGGGAATCTGTG
qRT-PCR-GRF5-F	CGATATGGAACCAGGAAGATGTAG
qRT-PCR-GRF5-R	TCCACAGGCTTTCTTGAACG
qRT-PCR-miR396a-F	CCTAATTTGGGTTTCAATTGTGAG
qRT-PCR-miR396a-R	CCCACAGCTTTATTGAACAGC
